# Supplementary material for: Ultraviolet-driven metal oxide semiconductor synapses with improved long-term potentiation
Source: Royal Society of Chemistry journal article supplement (doi:10.1039/d2tc04340h), 2022-12-06
Supplement: d2tc04340h1.pdf [file d2tc04340h1.pdf]

**Ultraviolet-driven metal oxide semiconductor synapses with  
improved long-term potentiation**

**Supporting Information**

Shuwen Xin,<sup>‡a</sup> Yu Chang,<sup>‡a</sup> Ruifu Zhou,<sup>b</sup> Haofei Cong,<sup>a</sup> Lingyan Zheng,<sup>a</sup> Yuxiao Wang,<sup>a</sup> Yuanbin Qin,<sup>c</sup> Peilong Xu,<sup>d</sup> Xuhai Liu,<sup>\*b</sup> and Fengyun Wang<sup>\*a</sup>

<sup>a</sup>. College of Physics, Qingdao University, Qingdao 266071, China

<sup>b</sup>. College of Microtechnology & Nanotechnology, Qingdao University, Qingdao 266071, China

<sup>c</sup>. School of Materials Science and Engineering, Xi'an Jiaotong University, Xi'an 710000, China

<sup>d</sup>. State Key Laboratory of Bio Fibers and Eco Textiles, Qingdao University, Qingdao 266071, China

**E-mail:** fywang@qdu.edu.cn

xuhai@qdu.edu.cn

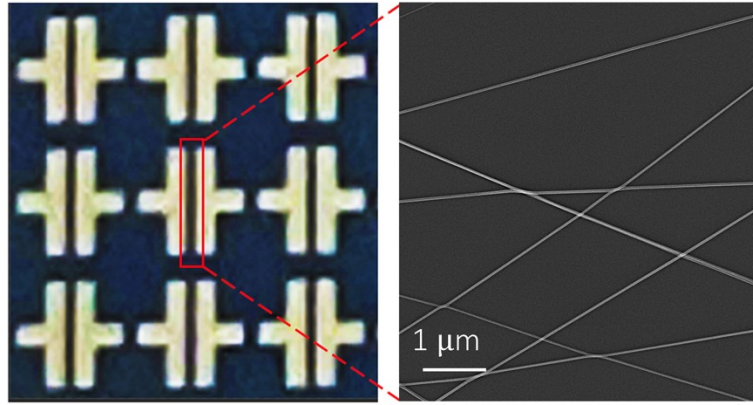

**Fig. S1** Optical image of a  $3 \times 3$  array of InZnO nanowire synaptic transistors. Inset: zoomed-in SEM image of the transistor channel area marked by a red rectangle.

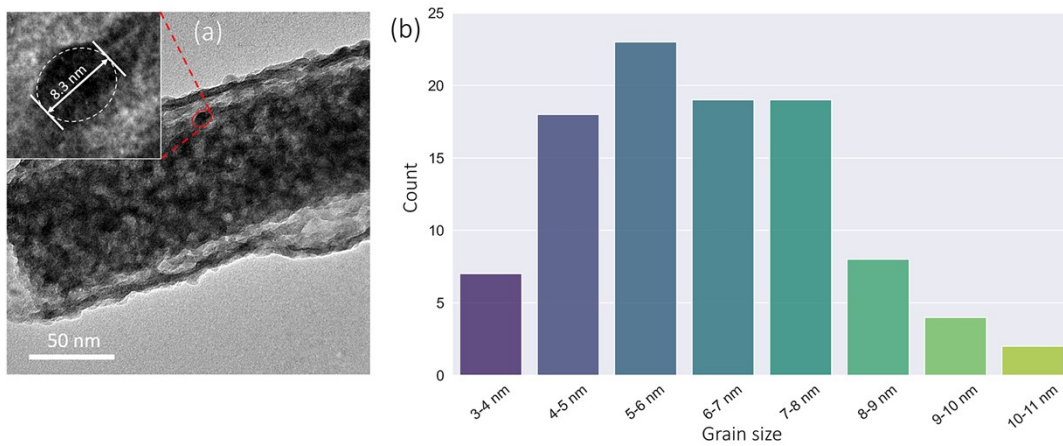

**Fig. S2** (a) HRTEM image showing an exemplified grain with grain size of approximately 8.3 nm. (b) The number distribution of one hundred different grain size in the corresponding HRTEM image illustrated in Fig. S2a.

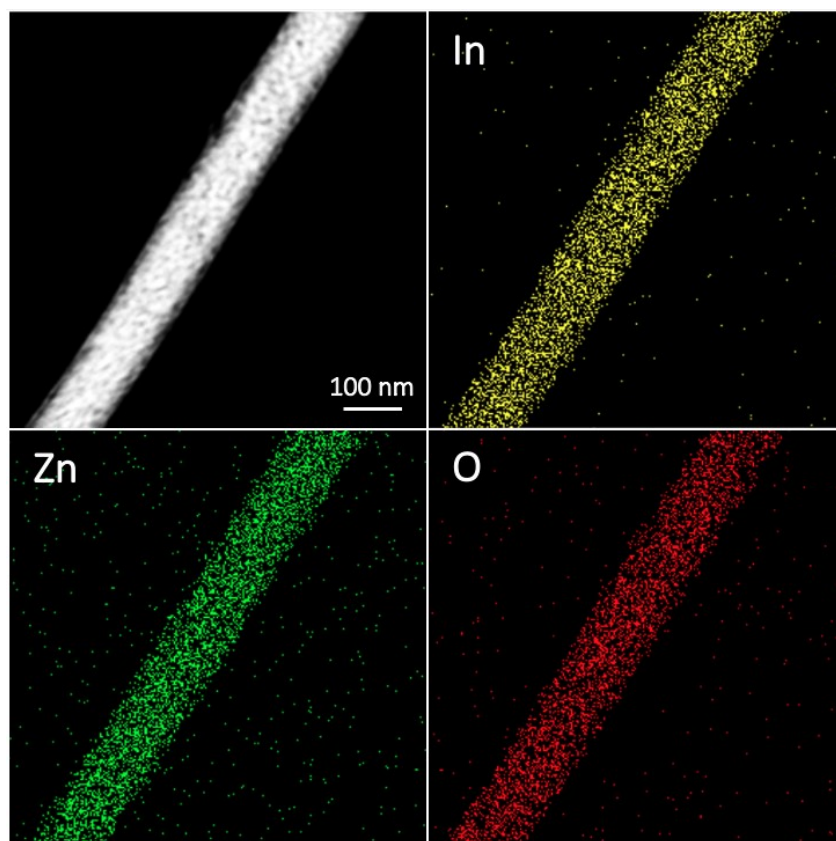

**Fig. S3** EDS elemental mapping of In, Zn, and O atoms.

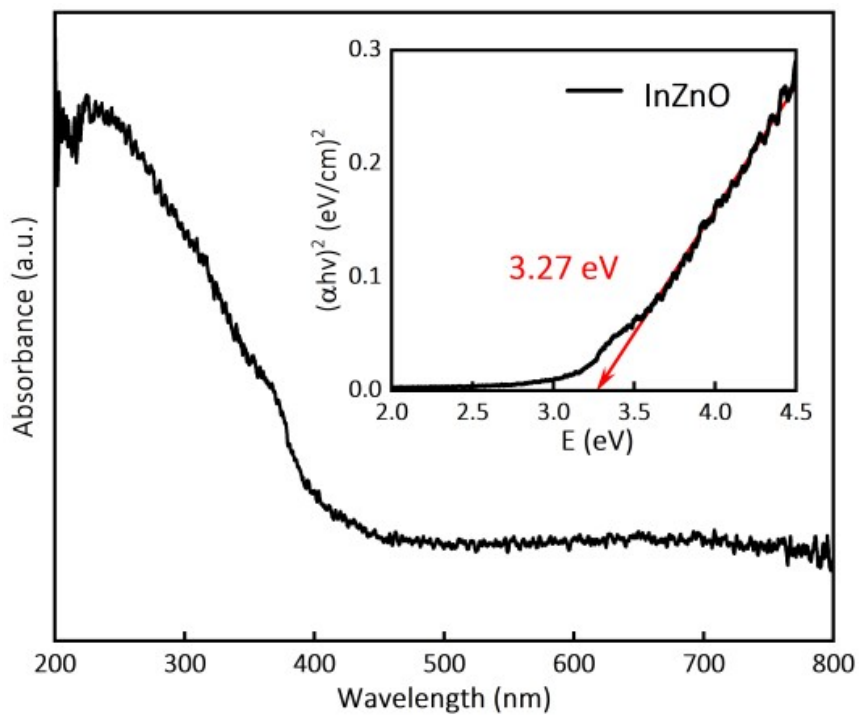

**Fig. S4** UV-vis spectrum of InZnO nanowires. Inset: Tauc plot to estimate optical bandgap.

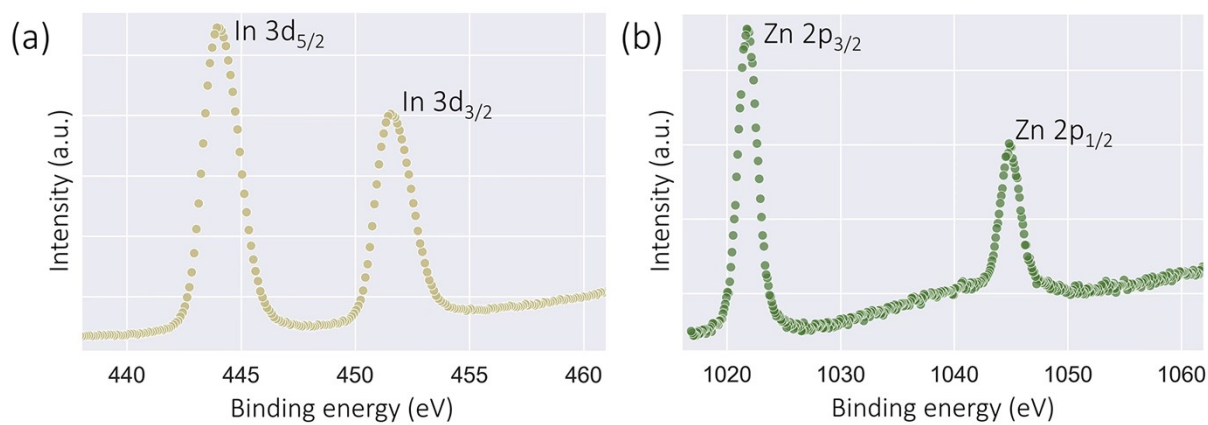

**Fig. S5** XPS spectra of (a) In 3d, (b) Zn 2p in InZnO.

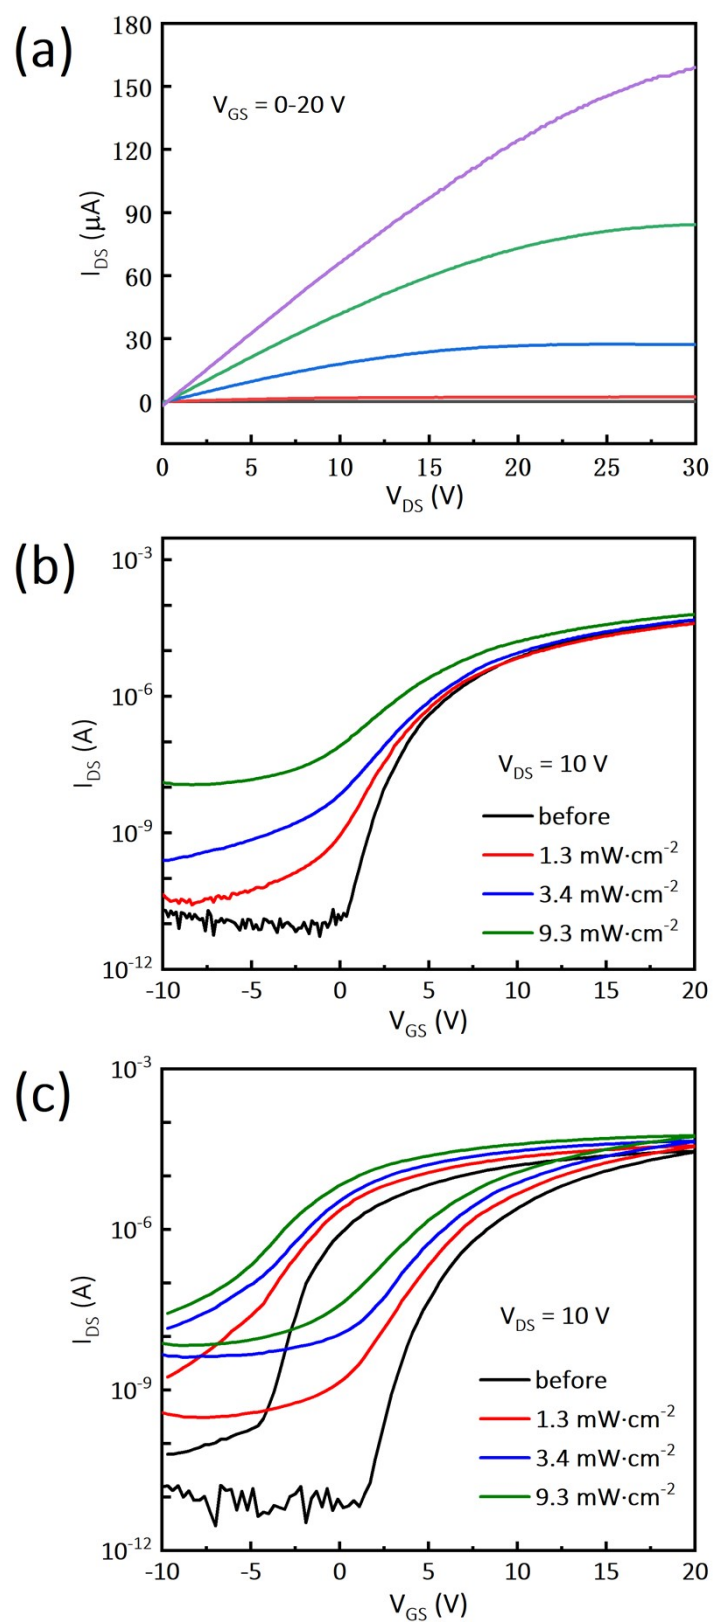

**Fig. S6** (a) Output characteristic curve of the InZnO transistor. Transfer curves (b) and dual sweep of the transfer curves (c) based on the InZnO transistor with and without light illumination.

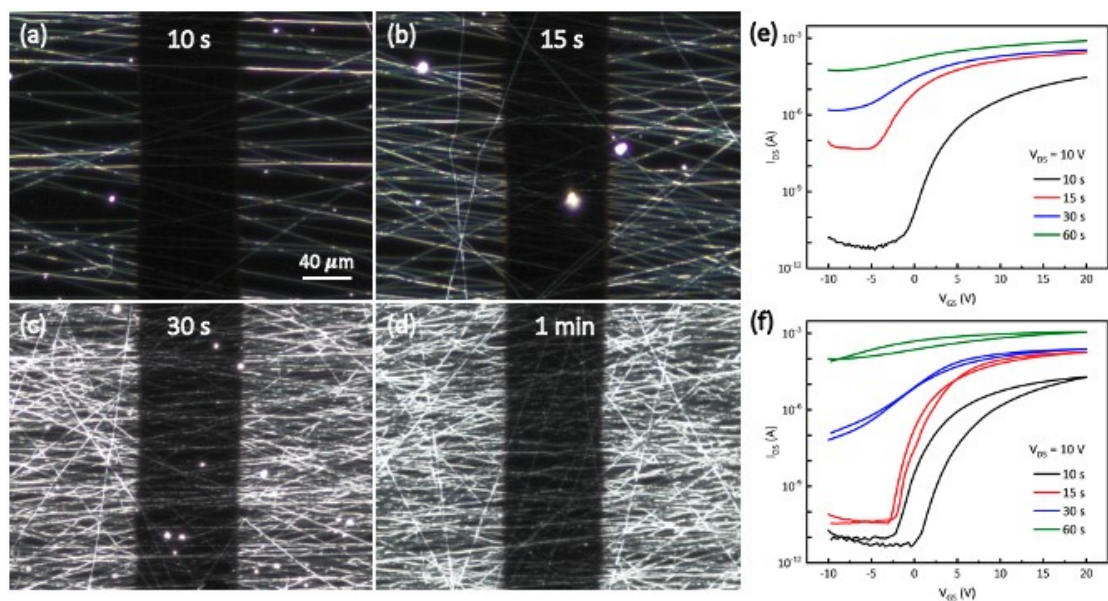

**Fig. S7** Optical diagram with different spinning time of 10 s (a), 15 s (b), 30 s (c) and 1 min (d). Single (e) and dual (f) sweep transfer curves of the InZnO transistor at different spinning time.

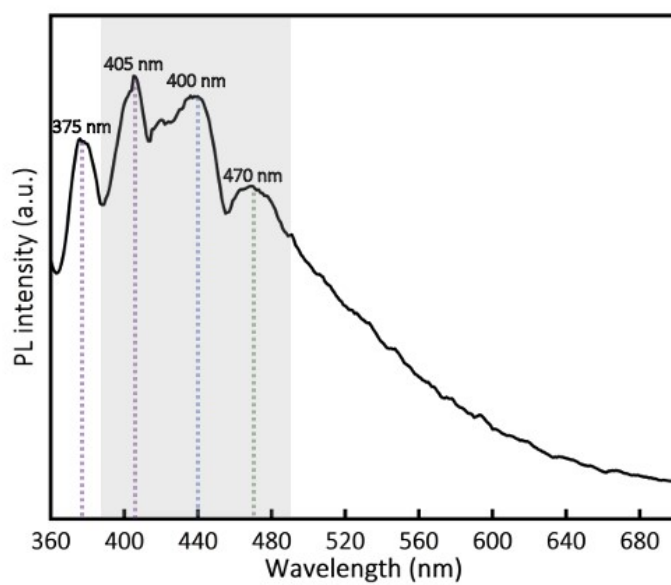

**Fig. S8** PL spectrum of the InZnO sample.

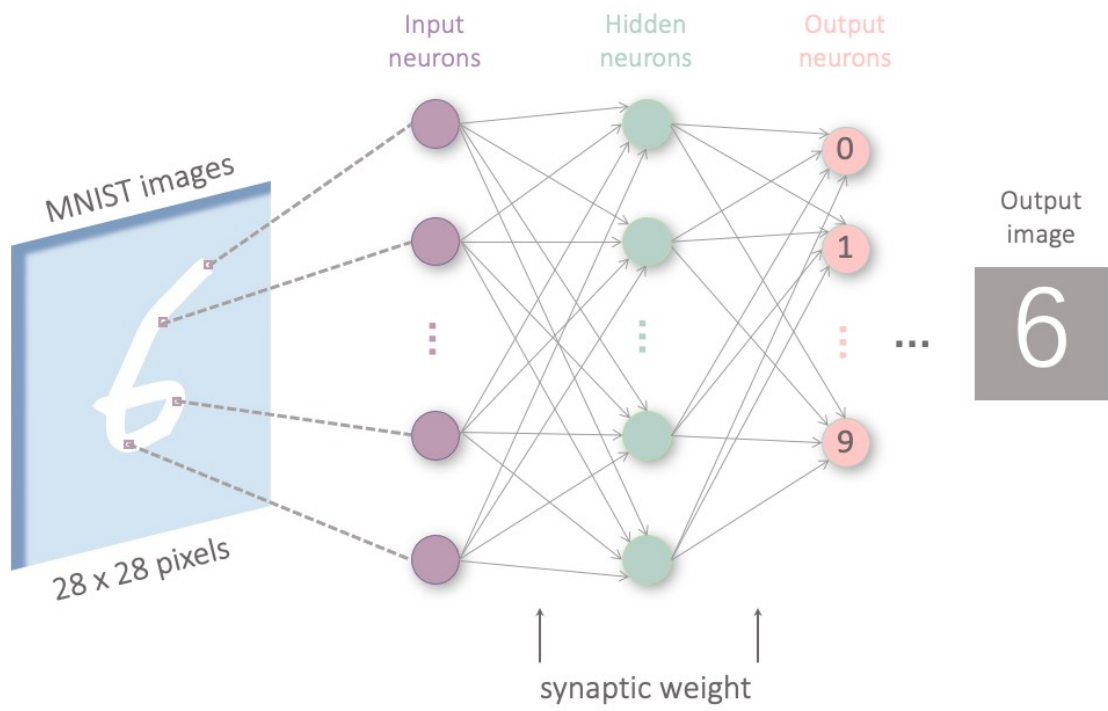

**Fig. S9** Schematic illustration of artificial neural network for hand-written recognition.
